# Supplementary material
Source: PubMed Central journal article supplement (PMC4519436)
Supplement: NIHMS695690-supplement-2.pdf [file NIHMS695690-supplement-2.pdf]

| Experimental Condition                                              | Animal     | Spine/Bouton/Puncta | Branch         | Branch Length (µm) | Density (/ 100µm) | Experimental Condition                                              | Animal       | Spine/Bouton/Puncta | Branch        | Branch Length (µm) | Density (/ 100µm) |       |
|---------------------------------------------------------------------|------------|---------------------|----------------|--------------------|-------------------|---------------------------------------------------------------------|--------------|---------------------|---------------|--------------------|-------------------|-------|
| Apical Dendrites – Forelimb (spine)                                 | 1          | 70                  | 6              | 147.89             | 47.33             | SOM-Cre;Thy1-EGFP, Flex-ChR2, training with stimulation (spine)     | 1            | 28                  | 4             | 146.24             | 19.15             |       |
|                                                                     | 2          | 42                  | 4              | 83.34              | 50.40             |                                                                     | 2            | 67                  | 10            | 298.31             | 22.46             |       |
|                                                                     | 3          | 37                  | 3              | 76.01              | 48.68             |                                                                     | 3            | 61                  | 10            | 190.45             | 32.03             |       |
|                                                                     | 4          | 43                  | 3              | 101.73             | 42.27             |                                                                     | 4            | 74                  | 9             | 278.84             | 26.54             |       |
|                                                                     | 5          | 59                  | 5              | 117.48             | 50.22             |                                                                     | 5            | 25                  | 5             | 124.89             | 20.02             |       |
| <b>Total</b>                                                        | <b>251</b> | <b>21</b>           | <b>526.44</b>  | <b>47.68</b>       | <b>Total</b>      | <b>255</b>                                                          | <b>38</b>    | <b>1038.73</b>      | <b>24.55</b>  |                    |                   |       |
| Basal Dendrites – Forelimb (spine)                                  | 1          | 21                  | 3              | 43.61              | 48.16             | SOM-Cre;Thy1-EGFP, Flex-ChR2, no training with stimulation (spine)  | 1            | 32                  | 4             | 112.40             | 28.47             |       |
|                                                                     | 2          | 58                  | 4              | 114.92             | 50.47             |                                                                     | 2            | 45                  | 4             | 135.70             | 33.16             |       |
|                                                                     | 3          | 61                  | 4              | 126.01             | 48.41             |                                                                     | 3            | 29                  | 5             | 128.71             | 22.53             |       |
|                                                                     | 4          | 21                  | 3              | 42.29              | 49.66             |                                                                     | 4            | 31                  | 5             | 150.95             | 20.54             |       |
|                                                                     | 5          | 45                  | 4              | 69.87              | 64.40             |                                                                     | 5            | 43                  | 5             | 146.16             | 29.42             |       |
| <b>Total</b>                                                        | <b>206</b> | <b>18</b>           | <b>396.70</b>  | <b>51.93</b>       | <b>Total</b>      | <b>180</b>                                                          | <b>23</b>    | <b>673.93</b>       | <b>26.71</b>  |                    |                   |       |
| PV boutons – Forelimb                                               | 1          | 68                  | 4              | 321.24             | 36.59             | SOM-Cre;Thy1-EGFP, Flex-ChR2, training with no stimulation (spine)  | 1            | 57                  | 6             | 232.29             | 24.54             |       |
|                                                                     | 2          | 56                  | 4              | 239.34             | 38.35             |                                                                     | 2            | 89                  | 8             | 293.46             | 30.33             |       |
|                                                                     | 3          | 111                 | 9              | 247.62             | 37.07             |                                                                     | 3            | 35                  | 3             | 143.78             | 24.34             |       |
|                                                                     | 4          | 57                  | 6              | 275.91             | 34.39             |                                                                     | 4            | 72                  | 7             | 278.03             | 25.90             |       |
|                                                                     | 5          | 104                 | 8              | 332.71             | 31.92             |                                                                     | 5            | 63                  | 7             | 157.61             | 39.97             |       |
| <b>Total</b>                                                        | <b>433</b> | <b>39</b>           | <b>1416.82</b> | <b>30.56</b>       | <b>Total</b>      | <b>316</b>                                                          | <b>31</b>    | <b>1105.18</b>      | <b>28.59</b>  |                    |                   |       |
| SOM boutons - Forelimb                                              | 1          | 108                 | 10             | 185.84             | 33.62             | SOM-Cre;Thy1-EGFP, Flex-eNpHR, training with stimulation (spine)    | 1            | 61                  | 7             | 190.20             | 32.07             |       |
|                                                                     | 2          | 94                  | 7              | 146.01             | 39.27             |                                                                     | 2            | 82                  | 7             | 320.30             | 25.60             |       |
|                                                                     | 3          | 72                  | 7              | 299.44             | 29.08             |                                                                     | 3            | 68                  | 13            | 186.60             | 36.44             |       |
|                                                                     | 4          | 84                  | 8              | 165.75             | 30.44             |                                                                     | 4            | 53                  | 9             | 178.50             | 29.69             |       |
|                                                                     | 5          | 75                  | 7              | 325.83             | 22.54             |                                                                     | 5            | 64                  | 8             | 387.61             | 16.51             |       |
| <b>Total</b>                                                        | <b>396</b> | <b>31</b>           | <b>1122.86</b> | <b>35.27</b>       | <b>Total</b>      | <b>397</b>                                                          | <b>52</b>    | <b>1595.94</b>      | <b>24.88</b>  |                    |                   |       |
| Som-Cre;Thy1-EGFP, baseline (spine)                                 | 1          | 31                  | 4              | 129.37             | 23.96             | SOM-Cre;Thy1-EGFP, Flex-eNpHR, no training with stimulation (spine) | 1            | 32                  | 4             | 139.56             | 22.93             |       |
|                                                                     | 2          | 41                  | 4              | 239.07             | 17.15             |                                                                     | 2            | 37                  | 6             | 141.59             | 26.13             |       |
|                                                                     | 3          | 48                  | 4              | 197.19             | 24.34             |                                                                     | 3            | 51                  | 4             | 184.64             | 27.62             |       |
|                                                                     | 4          | 38                  | 5              | 168.12             | 22.60             |                                                                     | 4            | 72                  | 5             | 233.46             | 30.84             |       |
|                                                                     | 5          | 33                  | 5              | 212.09             | 15.56             |                                                                     | <b>Total</b> | <b>192</b>          | <b>19</b>     | <b>699.25</b>      | <b>27.46</b>      |       |
| <b>Total</b>                                                        | <b>191</b> | <b>22</b>           | <b>945.84</b>  | <b>20.19</b>       | <b>Total</b>      | <b>316</b>                                                          | <b>31</b>    | <b>1105.18</b>      | <b>28.59</b>  |                    |                   |       |
| SOM-Cre;Thy1-EGFP, Flex-TdTomato, training with stimulation (spine) | 1          | 37                  | 4              | 125.26             | 27.14             | PV-Cre;Thy1-EGFP, Flex-ChR2, training with stimulation (spine)      | 1            | 40                  | 3             | 185.23             | 21.59             |       |
|                                                                     | 2          | 41                  | 4              | 123.09             | 28.43             |                                                                     | 2            | 28                  | 3             | 79.88              | 35.05             |       |
|                                                                     | 3          | 55                  | 8              | 266.96             | 20.60             |                                                                     | 3            | 44                  | 7             | 159.74             | 27.54             |       |
|                                                                     | 4          | 39                  | 6              | 158.03             | 24.68             |                                                                     | 4            | 58                  | 7             | 186.14             | 31.16             |       |
|                                                                     | 5          | 50                  | 8              | 222.20             | 22.50             |                                                                     | 5            | 28                  | 3             | 112.66             | 24.85             |       |
|                                                                     | 6          | 22                  | 3              | 98.31              | 22.38             | <b>Total</b>                                                        | <b>198</b>   | <b>23</b>           | <b>723.66</b> | <b>27.36</b>       |                   |       |
|                                                                     | 7          | 53                  | 8              | 164.85             | 32.15             | PV-Cre;Thy1-EGFP, Flex-ChR2, no training with stimulation (spine)   | 1            | 65                  | 6             | 249.27             | 26.08             |       |
|                                                                     | 8          | 72                  | 4              | 263.90             | 27.28             |                                                                     | 2            | 73                  | 7             | 287.50             | 25.39             |       |
|                                                                     | 9          | 86                  | 9              | 205.33             | 41.88             |                                                                     | 3            | 52                  | 7             | 164.22             | 31.66             |       |
|                                                                     | 10         | 67                  | 8              | 359.21             | 18.65             |                                                                     | 4            | 57                  | 6             | 140.95             | 40.44             |       |
|                                                                     | 11         | 68                  | 9              | 183.08             | 37.14             |                                                                     | 5            | 30                  | 5             | 141.80             | 21.16             |       |
|                                                                     | 12         | 75                  | 11             | 209.88             | 35.73             | <b>Total</b>                                                        | <b>277</b>   | <b>31</b>           | <b>983.73</b> | <b>28.16</b>       |                   |       |
| <b>Total</b>                                                        | <b>665</b> | <b>82</b>           | <b>2380.08</b> | <b>27.94</b>       | <b>Total</b>      | <b>316</b>                                                          | <b>31</b>    | <b>1105.18</b>      | <b>28.59</b>  |                    |                   |       |
| Distal Spine - Forelimb Baseline                                    | 1          | 65                  | 7              | 245.66             | 26.46             | Gephyrin puncta – Baseline                                          |              | 1                   | 42            | 10                 | 240.64            | 17.45 |
|                                                                     | 2          | 47                  | 5              | 115.87             | 40.56             | 2                                                                   | 33           | 6                   | 206.14        | 16.01              |                   |       |
|                                                                     | 3          | 52                  | 6              | 133.15             | 39.05             | 3                                                                   | 63           | 8                   | 324.88        | 19.39              |                   |       |
|                                                                     | 4          | 21                  | 1              | 63.46              | 33.09             | Gephyrin puncta - Training                                          |              | 1                   | 54            | 9                  | 458.30            | 11.78 |
|                                                                     | 5          | 19                  | 2              | 86.48              | 21.97             | 2                                                                   | 95           | 11                  | 458.91        | 20.70              |                   |       |
|                                                                     | 6          | 33                  | 2              | 89.93              | 36.69             | 3                                                                   | 80           | 10                  | 408.90        | 19.56              |                   |       |
|                                                                     | 7          | 20                  | 3              | 104.50             | 19.13             | 4                                                                   | 110          | 14                  | 771.74        | 14.25              |                   |       |
| <b>Total</b>                                                        | <b>257</b> | <b>26</b>           | <b>839.05</b>  | <b>30.99</b>       | <b>Total</b>      | <b>339</b>                                                          | <b>44</b>    | <b>2097.85</b>      | <b>16.16</b>  |                    |                   |       |
| Perisomatic Spine - Forelimb Baseline                               | 1          | 34                  | 4              | 129.41             | 26.27             | <b>Total Animals</b>                                                |              | <b>107</b>          |               |                    |                   |       |
|                                                                     | 2          | 21                  | 3              | 108.11             | 19.42             | <b>Total Spine/Bouton/Puncta Scored</b>                             |              | <b>6082</b>         |               |                    |                   |       |
|                                                                     | 3          | 36                  | 5              | 108.17             | 33.28             | <b>Total Branch Covered (mm)</b>                                    |              | <b>23.82</b>        |               |                    |                   |       |
|                                                                     | 4          | 22                  | 2              | 107.03             | 20.55             |                                                                     |              |                     |               |                    |                   |       |
| <b>Total</b>                                                        | <b>113</b> | <b>14</b>           | <b>452.72</b>  | <b>24.88</b>       |                   |                                                                     |              |                     |               |                    |                   |       |
| SOM boutons - Forelimb Baseline                                     | 1          | 83                  | 9              | 345.39             | 24.03             |                                                                     |              |                     |               |                    |                   |       |
|                                                                     | 2          | 61                  | 9              | 232.06             | 26.29             |                                                                     |              |                     |               |                    |                   |       |
|                                                                     | 3          | 63                  | 6              | 154.30             | 40.83             |                                                                     |              |                     |               |                    |                   |       |
|                                                                     | 4          | 86                  | 4              | 251.85             | 34.15             |                                                                     |              |                     |               |                    |                   |       |
|                                                                     | 5          | 81                  | 4              | 240.09             | 33.74             |                                                                     |              |                     |               |                    |                   |       |
|                                                                     | 6          | 90                  | 6              | 392.30             | 22.94             |                                                                     |              |                     |               |                    |                   |       |
| <b>Total</b>                                                        | <b>464</b> | <b>38</b>           | <b>1615.99</b> | <b>28.71</b>       |                   |                                                                     |              |                     |               |                    |                   |       |
| PV boutons - Forelimb Baseline                                      | 1          | 85                  | 7              | 205.12             | 41.44             |                                                                     |              |                     |               |                    |                   |       |
|                                                                     | 2          | 139                 | 12             | 469.61             | 29.60             |                                                                     |              |                     |               |                    |                   |       |
|                                                                     | 3          | 89                  | 8              | 246.93             | 36.04             |                                                                     |              |                     |               |                    |                   |       |
|                                                                     | 4          | 52                  | 6              | 209.43             | 24.83             |                                                                     |              |                     |               |                    |                   |       |
|                                                                     | 5          | 65                  | 4              | 210.52             | 30.88             |                                                                     |              |                     |               |                    |                   |       |
|                                                                     | 6          | 58                  | 5              | 251.16             | 23.09             |                                                                     |              |                     |               |                    |                   |       |
| <b>Total</b>                                                        | <b>488</b> | <b>42</b>           | <b>1592.77</b> | <b>30.64</b>       |                   |                                                                     |              |                     |               |                    |                   |       |
| Apical Dendrites – Hindlimb (spine)                                 | 1          | 35                  | 3              | 164.23             | 21.31             |                                                                     |              |                     |               |                    |                   |       |
|                                                                     | 2          | 36                  | 4              | 206.80             | 17.41             |                                                                     |              |                     |               |                    |                   |       |
|                                                                     | 3          | 28                  | 4              | 131.43             | 21.30             |                                                                     |              |                     |               |                    |                   |       |
|                                                                     | 4          | 26                  | 3              | 145.78             | 17.84             |                                                                     |              |                     |               |                    |                   |       |
|                                                                     | 5          | 41                  | 3              | 153.39             | 26.73             |                                                                     |              |                     |               |                    |                   |       |
| <b>Total</b>                                                        | <b>166</b> | <b>17</b>           | <b>801.62</b>  | <b>20.71</b>       |                   |                                                                     |              |                     |               |                    |                   |       |
| SOM boutons – Hindlimb (spine)                                      | 1          | 56                  | 3              | 210.53             | 26.60             |                                                                     |              |                     |               |                    |                   |       |
|                                                                     | 2          | 85                  | 6              | 221.94             | 38.30             |                                                                     |              |                     |               |                    |                   |       |
|                                                                     | 3          | 68                  | 4              | 233.16             | 29.16             |                                                                     |              |                     |               |                    |                   |       |
|                                                                     | 4          | 64                  | 6              | 207.29             | 30.87             |                                                                     |              |                     |               |                    |                   |       |
| <b>Total</b>                                                        | <b>273</b> | <b>19</b>           | <b>872.91</b>  | <b>31.27</b>       |                   |                                                                     |              |                     |               |                    |                   |       |

Supplementary Table 1

Summary of number of mice, spines/boutons/puncta, branch number, branch length, and density in all experimental conditions
